# Supplementary material for: KDM6A Loss Triggers an Epigenetic Switch That Disrupts Urothelial Differentiation and Drives Cell Proliferation in Bladder Cancer
Source: Oxford University Press journal article supplement (doi:10.1158/0008-5472.can-22-1444), 2023-01-13
Supplement: can-22-1444_supplementary_data_1_suppsd1.xlsx [file can-22-1444_supplementary_data_1_suppsd1.xlsx]

## Sheet: Sheet1
submitter_id	case_id	cohort
TCGA-BL-A13J	556fcbc8-172a-4af1-8822-ae036e8d68e8	BLCA
TCGA-BL-A3JM	0f4fb205-b13c-4a85-97b3-779429e6ccdd	BLCA
TCGA-CF-A1HR	39ea19e1-4959-4f1b-9934-54bdaf766842	BLCA
TCGA-CF-A3MI	f1ebf96b-8df9-4e59-acef-7ad433e40214	BLCA
TCGA-CU-A3YL	087a7f70-2fa8-4a16-b130-4df10a70c662	BLCA
TCGA-DK-A1AD	88a521ce-a5e9-4c6f-83d4-ec36a62fedb6	BLCA
TCGA-FD-A3SR	72d6e9aa-4a99-4fc9-a67b-4631e95fb043	BLCA
TCGA-GD-A3OQ	2e85c30c-c4c4-4096-9eef-4eb2c7d991a3	BLCA
TCGA-GV-A3JW	3d644eaf-82fc-4bc7-93b7-3e600e8c6511	BLCA
TCGA-H4-A2HO	86d1e388-b30f-48fd-9647-3848eb6134f1	BLCA
TCGA-3Z-A93Z	2b1dea0a-6d55-4fdd-9c1c-0d9fbe03bd78	KIRC
TCGA-6D-AA2E	d3b47e53-6f40-4fc8-b5a4-cbe548a770a9	KIRC
TCGA-B2-A4SR	fc7065fc-d834-4e7d-98bd-ca6666beb6cb	KIRC
TCGA-B8-A54E	59d18f0c-946f-4850-892f-70e2bf380232	KIRC
TCGA-B8-A54F	540cbfa7-d17d-44f5-b67e-f2b9b03827cd	KIRC
TCGA-B8-A54G	ea456a1f-6e2c-4b34-ad24-ccd614bd57c9	KIRC
TCGA-B8-A54H	3280a078-8841-4c5c-a361-b58bc37b965c	KIRC
TCGA-B8-A54J	09d7ce7a-774e-4784-9c9a-32b766fdb173	KIRC
TCGA-B8-A54K	a2663a86-a006-4867-9e88-2b523df48303	KIRC
TCGA-B8-A8YJ	04beccb3-f513-4d60-b57f-a4382e4eeda3	KIRC
TCGA-CJ-5671	960d1eaf-0b96-488b-b62c-829c024fd4b8	KIRC
TCGA-CJ-5677	d2664fde-ce3b-45e6-9a23-4a07980f7bac	KIRC
TCGA-CJ-5679	3fa6c93e-e7fe-402c-9526-c81411aa0920	KIRC
TCGA-DV-A4VX	ef2d7ef5-cdfc-48c9-b3fe-6eaf3be1106d	KIRC
TCGA-GK-A6C7	0df9ec46-d600-4845-9d00-2dc2732c68d1	KIRC
TCGA-MM-A564	620baefa-db8f-4af9-9101-4b9b252fa73e	KIRC
TCGA-2K-A9WE	73292c19-d6a8-4bc4-97bc-ccce54f264f8	KIRP
TCGA-4A-A93X	deace3d5-26fc-44d3-9f39-b5cde2c94152	KIRP
TCGA-4A-A93Y	b87bc182-b1c7-4e8d-a34b-704431b1d8d0	KIRP
TCGA-B1-A47N	f1ec5a7b-0973-4c38-9908-862196df9541	KIRP
TCGA-B1-A654	21415ae7-dad6-40c4-be9d-3f881b558fbd	KIRP
TCGA-B9-A44B	b809c2f2-185c-496a-a1d4-589294443a1d	KIRP
TCGA-B9-A5W8	fcb7ed90-6c6b-4420-8d5b-4fc6f763adaa	KIRP
TCGA-B9-A5W9	9fc9c087-0c82-49ea-8437-861a3029c3d4	KIRP
TCGA-B9-A8YI	9e4c8e1e-041c-4c95-9801-70c8dd0a7797	KIRP
TCGA-F9-A7Q0	366f39be-05ab-402b-9525-725e095de570	KIRP
TCGA-F9-A7VF	69e6da3c-2a03-48bc-bc2a-019b21820149	KIRP
TCGA-F9-A8NY	94394c85-6a69-4553-b1ee-c2364d5b4dd1	KIRP
TCGA-GL-A9DC	12560466-52ca-4114-8c9b-4853599628f1	KIRP
TCGA-HE-A5NH	98a639c2-d615-4dc1-98f0-298752b69b09	KIRP
TCGA-HE-A5NI	d61e22d8-c3ce-4237-83d7-da188b9fd456	KIRP
TCGA-HE-A5NJ	8d28f586-3de5-4033-a9fd-4f67be406fb4	KIRP
TCGA-HE-A5NK	f9306cb1-c4e4-42eb-8aa9-ee906c408e10	KIRP
TCGA-IA-A40U	64b35577-c430-4f11-8a34-965921e3a37d	KIRP
TCGA-IA-A40X	0c151271-2cf9-43f4-9e9b-fe927de43131	KIRP
TCGA-KV-A74V	6eb010c4-c906-42d4-894d-8b47de90e023	KIRP
TCGA-P4-A5E6	87c5e2cb-0b2e-4f40-927b-5e1ad7de4824	KIRP
TCGA-P4-A5EA	4af65061-a15f-48d5-b4c0-30003386bf2e	KIRP
TCGA-P4-A5EB	ac8cadda-c01e-4e8d-9557-38e0a36c3210	KIRP
TCGA-P4-A5ED	104604c8-2cb5-4538-b964-dbff3b6bc19f	KIRP
TCGA-P4-AAVL	39847790-c951-4f9d-b23c-88c7f44d20a0	KIRP
TCGA-PJ-A8JU	d750d092-77e6-4a0f-8de6-8280cbcd6f7e	KIRP
TCGA-Q2-A5QZ	4a9a3a6d-090a-4c26-b16c-d65055f05628	KIRP
TCGA-UZ-A9PJ	a904ce56-42e6-4e61-ab62-cdf8192afbb4	KIRP
TCGA-UZ-A9PK	92dec9c3-27c1-48c4-8184-5d8d12678992	KIRP
TCGA-UZ-A9PL	e0c97b37-9834-4811-981e-dcb8982dba44	KIRP
TCGA-UZ-A9PM	234a072c-f473-41bc-9d7a-39e0f949f7a5	KIRP
TCGA-UZ-A9PP	0db35585-c319-4feb-b157-41fa14f9aa11	KIRP
TCGA-UZ-A9PQ	e3d519cf-7727-4ae1-92d1-156f5add1701	KIRP
TCGA-UZ-A9PV	5503f854-8eea-49b7-a196-bdc6c3c5815b	KIRP
TCGA-EJ-7218	d7763066-fb06-4519-9188-5de7dd12fdb7	PRAD
TCGA-EJ-7318	5e2ff1e6-87bc-4b91-a959-f0f553af4e27	PRAD
TCGA-EJ-A46B	1170f449-dfb5-417a-a89b-b2229a2785db	PRAD
TCGA-EJ-A46D	93d10d8b-5f98-4d2c-8af3-11471385d4d4	PRAD
TCGA-EJ-A46E	a608bf0e-a932-4541-8439-2ffb9f6294b0	PRAD
TCGA-EJ-A46F	08f11bdd-d665-45ab-b1a2-5485d91922c2	PRAD
TCGA-EJ-A46G	969399cd-47b6-4c0f-8939-3860be3014f9	PRAD
TCGA-EJ-A46H	cec1d2ff-36e6-497e-892c-b329724b4722	PRAD
TCGA-EJ-A65B	df3362cb-0f6b-412e-8af4-c5606526be17	PRAD
TCGA-EJ-A65F	8631bb5e-6d08-4c20-a85e-cb84f5dac290	PRAD
TCGA-EJ-A7NG	607fd22b-f281-431b-848e-ae01e69567e2	PRAD
TCGA-EJ-A7NM	aa8b99fd-973f-465d-ae24-3421fe784687	PRAD
TCGA-EJ-A8FN	ea770d22-2cba-465c-9555-e0877dcecb9f	PRAD
TCGA-EJ-A8FP	00f0f7dd-71de-4e4f-b4b5-df860324f2e8	PRAD
TCGA-KC-A4BV	a8c954b7-3077-4ff1-b311-d4b4bfa49786	PRAD
TCGA-SU-A7E7	2648c3c9-9884-4a0c-96aa-61130cd289ea	PRAD
TCGA-VN-A88K	a186c956-6756-4339-9793-494fe9b80c94	PRAD
TCGA-VP-A875	e833ad67-2cb3-414c-b15e-28f49479e2ef	PRAD
TCGA-YL-A8HJ	666d8b0c-593f-4ec3-b16a-2dadbead8c32	PRAD
TCGA-YL-A8SB	21a29827-7896-436d-ab52-e7edfc91e7d0	PRAD
TCGA-YL-A8SL	23ebc73d-be3b-42f8-9390-bf18a21afc5c	PRAD
TCGA-YL-A8SP	c506fae4-7c0a-4705-8e80-5bcc122a8a32	PRAD
TCGA-YL-A9WK	b2bcc97f-03a6-409a-8b91-78221cb10d7f	PRAD
TCGA-ZG-A9L0	355e84e7-0d50-4bc2-a481-dfece2f8c687	PRAD
TCGA-ZG-A9L1	083cc988-19a5-49b4-97c0-4e7bcc5d5c08	PRAD
TCGA-ZG-A9L2	5e7a7629-800a-45c4-b4cb-314a853a1bec	PRAD
TCGA-2G-AAFM	a123784a-0b6b-4f9a-847f-c5a17cb922bb	TGCT
TCGA-2G-AAFO	6a32e197-db90-4b3a-adc9-63b4c55d2cda	TGCT
TCGA-2G-AAGS	a22235ef-0fd3-4087-a36c-bb22704450ea	TGCT
TCGA-2G-AAH8	6dfea807-028d-4ee3-991a-6c2607a8c8df	TGCT
TCGA-2G-AAKG	43cc3c60-f0a6-4b44-bd7b-8ec4da71991f	TGCT
TCGA-4K-AA1I	e08bddcd-8ea5-4994-af6a-9fe9b7c93da4	TGCT
TCGA-XE-AANI	c08e6d8f-329c-49d5-afc0-ff52e978b915	TGCT
TCGA-XE-AAOD	6af41619-490e-4ffb-9a7b-ad9b7483b5a2	TGCT
TCGA-XE-AAOF	2132f775-5d09-4b7f-b739-883b4aefb264	TGCT
