# Supplementary material for: KDM6A Loss Triggers an Epigenetic Switch That Disrupts Urothelial Differentiation and Drives Cell Proliferation in Bladder Cancer
Source: PubMed Central journal article supplement — Cancer Res. 2023 Jan 13;83(6):814–29. doi: 10.1158/0008-5472.CAN-22-1444 (PMC10015223; doi:10.1158/0008-5472.can-22-1444), 2023-01-13
Supplement: can-22-1444_supplementary_figure_3_suppsf3.pdf [file can-22-1444_supplementary_figure_3_suppsf3.pdf]

# Supp. Fig. 3

## A

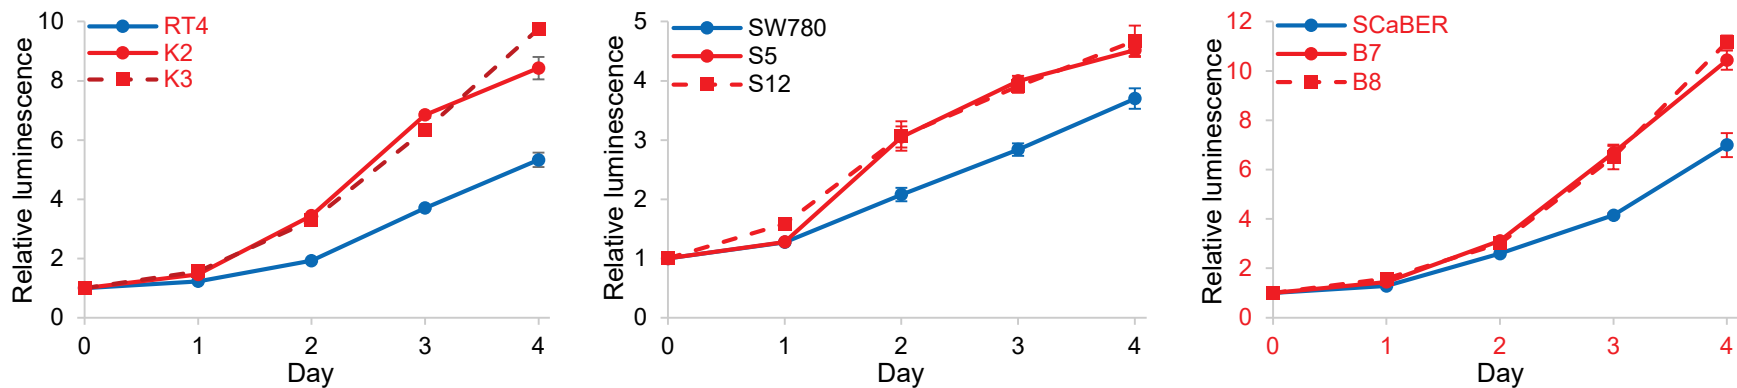

## B

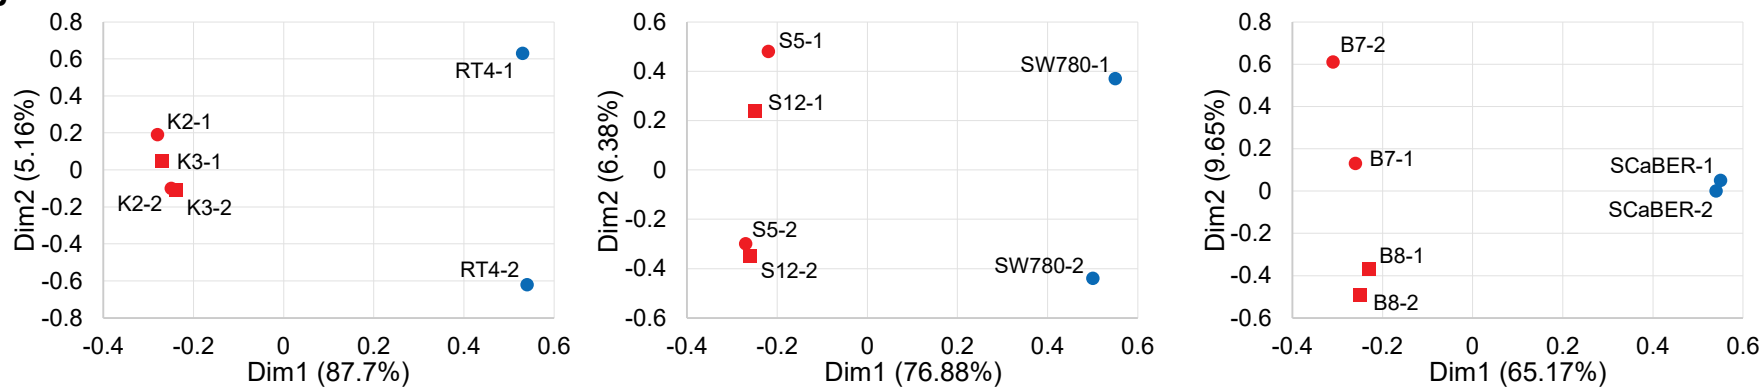

## C

| K2/K3 Enriched Motifs |       |                     | S5/S12 Enriched Motifs |       |                    | B7/B8 Enriched Motifs |       |                    |
|-----------------------|-------|---------------------|------------------------|-------|--------------------|-----------------------|-------|--------------------|
| Motif                 | Name  | P-value             | Motif                  | Name  | P-value            | Motif                 | Name  | P-value            |
|                       | ATF3  | 10 <sup>-3094</sup> |                        | FOSL1 | 10 <sup>-356</sup> |                       | TP63  | 10 <sup>-288</sup> |
|                       | FOSL1 | 10 <sup>-3085</sup> |                        | JUNB  | 10 <sup>-343</sup> |                       | TP53  | 10 <sup>-202</sup> |
|                       | BATF  | 10 <sup>-2980</sup> |                        | BATF  | 10 <sup>-332</sup> |                       | FOSL1 | 10 <sup>-87</sup>  |
|                       | AP-1  | 10 <sup>-2899</sup> |                        | FOSL2 | 10 <sup>-330</sup> |                       | ATF3  | 10 <sup>-85</sup>  |
|                       | JUNB  | 10 <sup>-2848</sup> |                        | ATF3  | 10 <sup>-330</sup> |                       | AP-1  | 10 <sup>-82</sup>  |
