# Supplementary figures and images for: KDM6A Loss Triggers an Epigenetic Switch That Disrupts Urothelial Differentiation and Drives Cell Proliferation in Bladder Cancer
Source: PubMed Central journal article supplement — Cancer Res. 2023 Jan 13;83(6):814–29. doi: 10.1158/0008-5472.CAN-22-1444 (PMC10015223; doi:10.1158/0008-5472.can-22-1444), 2023-01-13

# Supp. Fig. 1

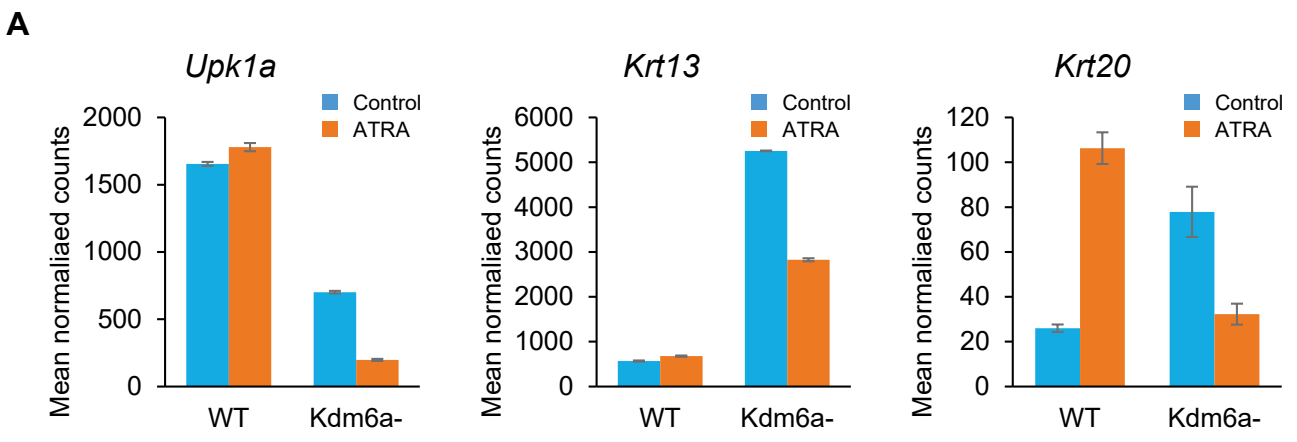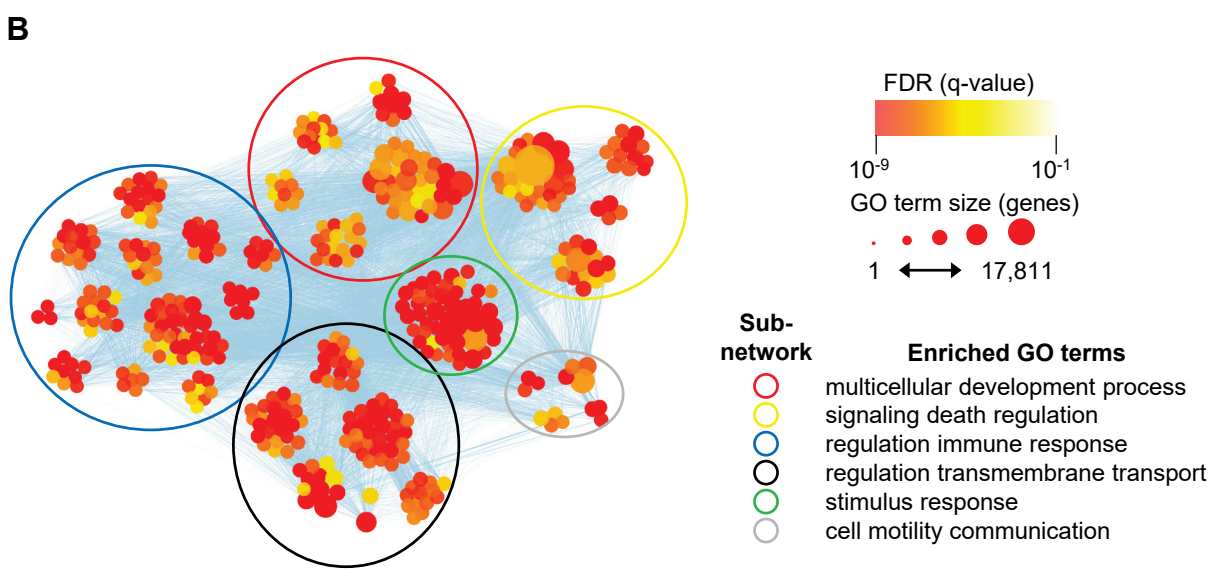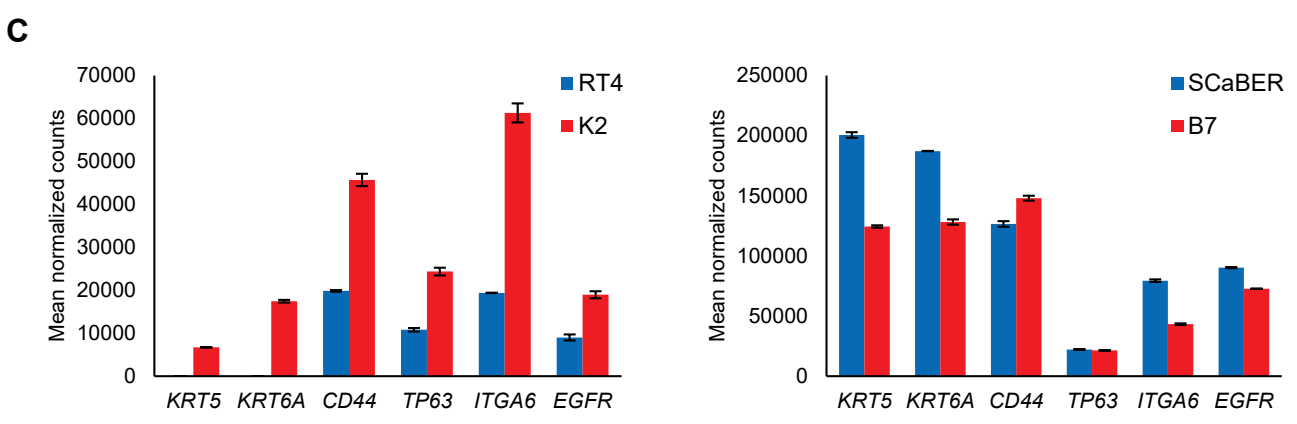

Supplement: can-22-1444_supplementary_figure_1_suppsf1.pdf [file can-22-1444_supplementary_figure_1_suppsf1.pdf]

**Supp. Fig. 2**

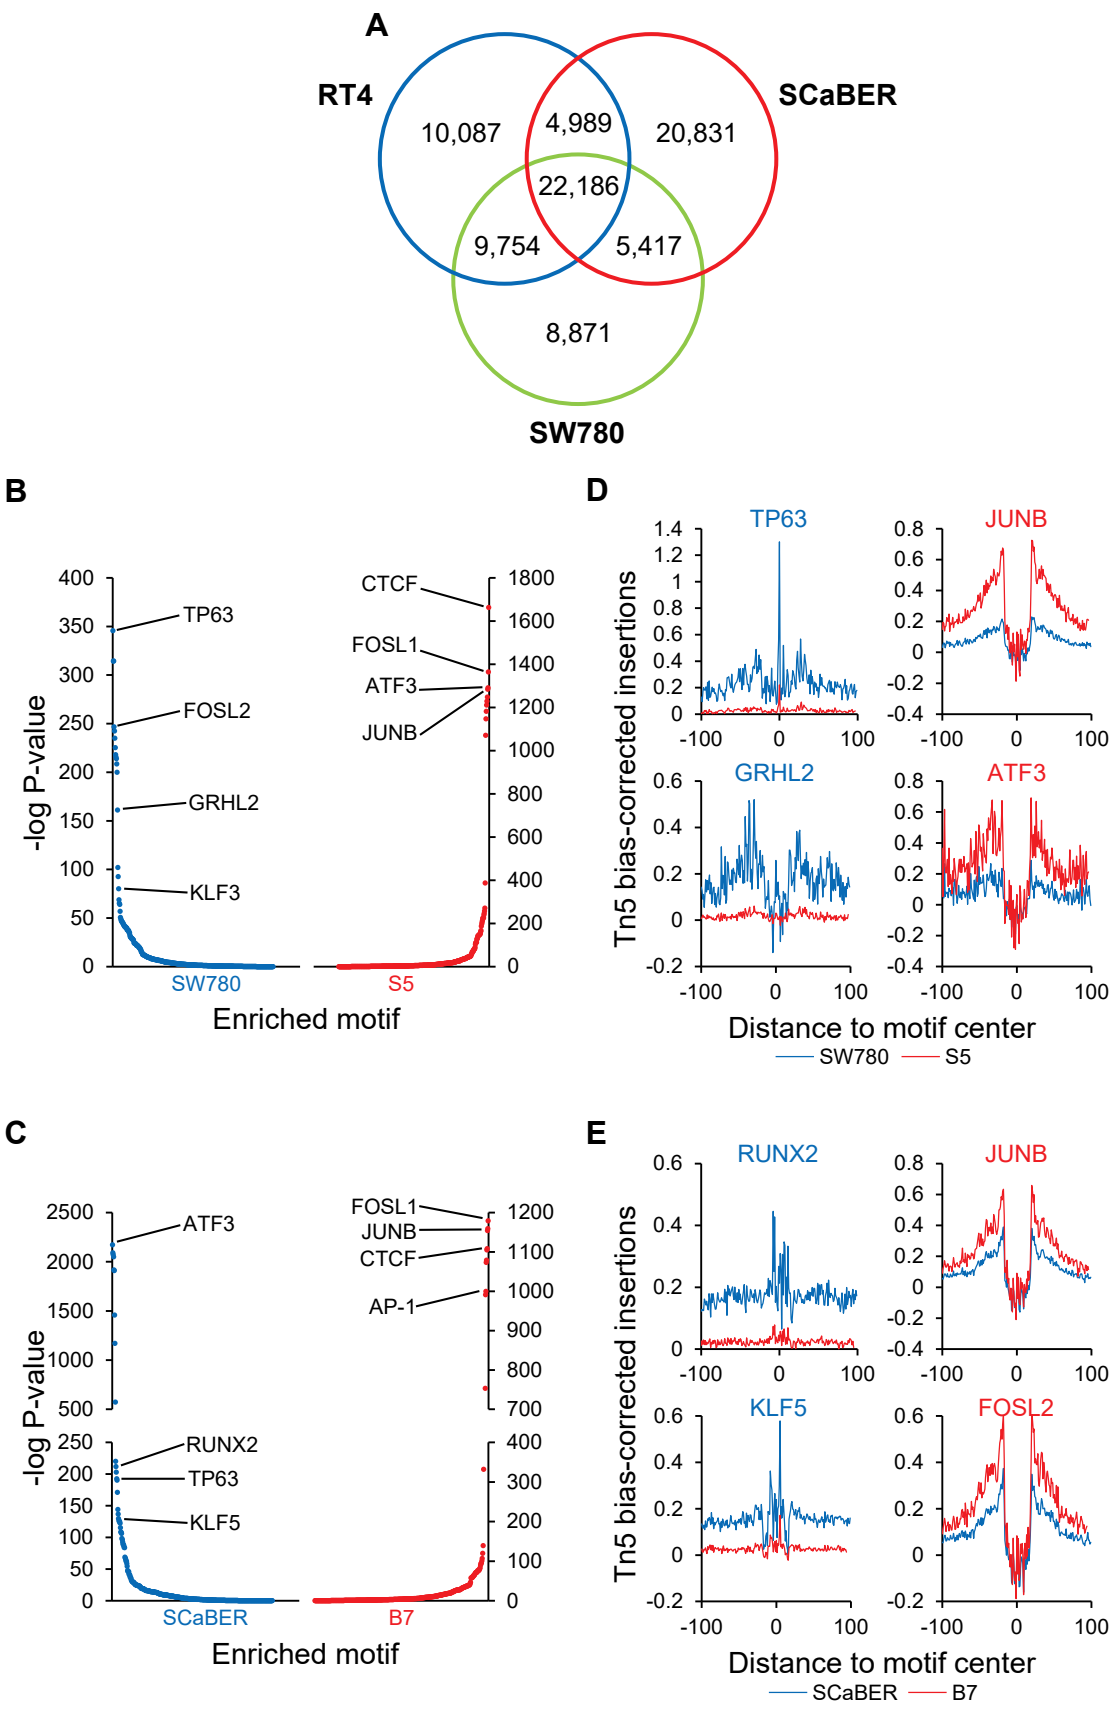

Supplement: can-22-1444_supplementary_figure_2_suppsf2.pdf [file can-22-1444_supplementary_figure_2_suppsf2.pdf]

# Supp. Fig. 4

**A**

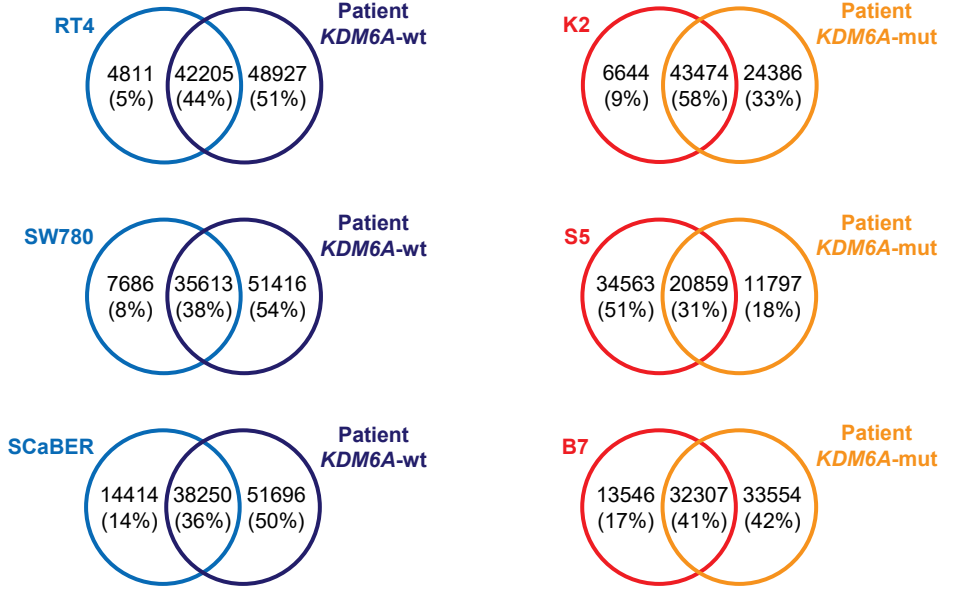

**B**

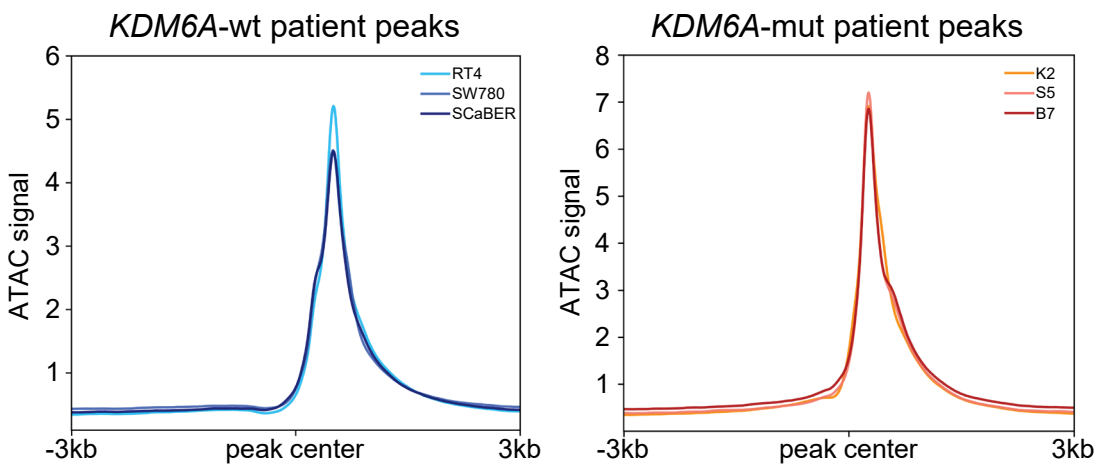

Supplement: can-22-1444_supplementary_figure_4_suppsf4.pdf [file can-22-1444_supplementary_figure_4_suppsf4.pdf]

**Supp. Fig. 5**

**A**

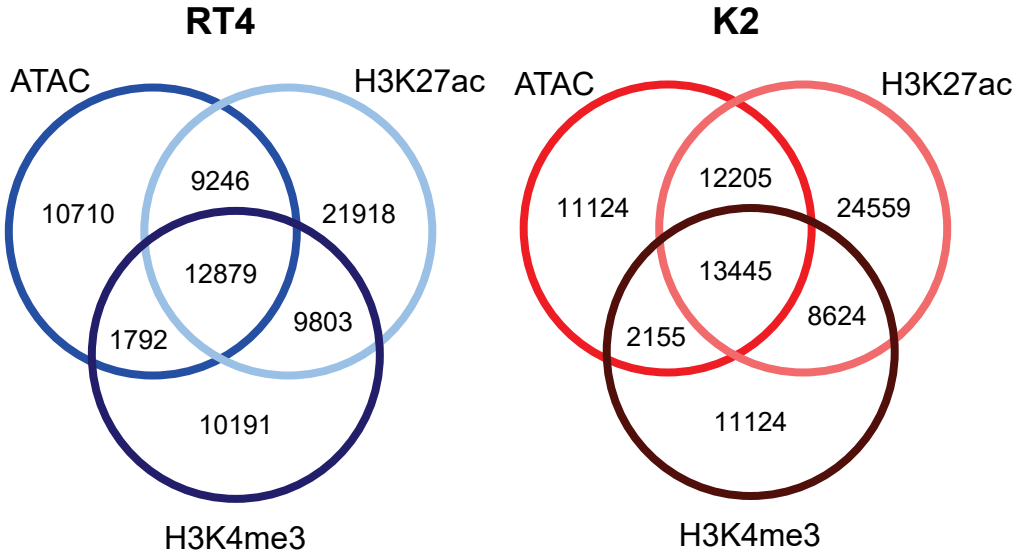

**B**

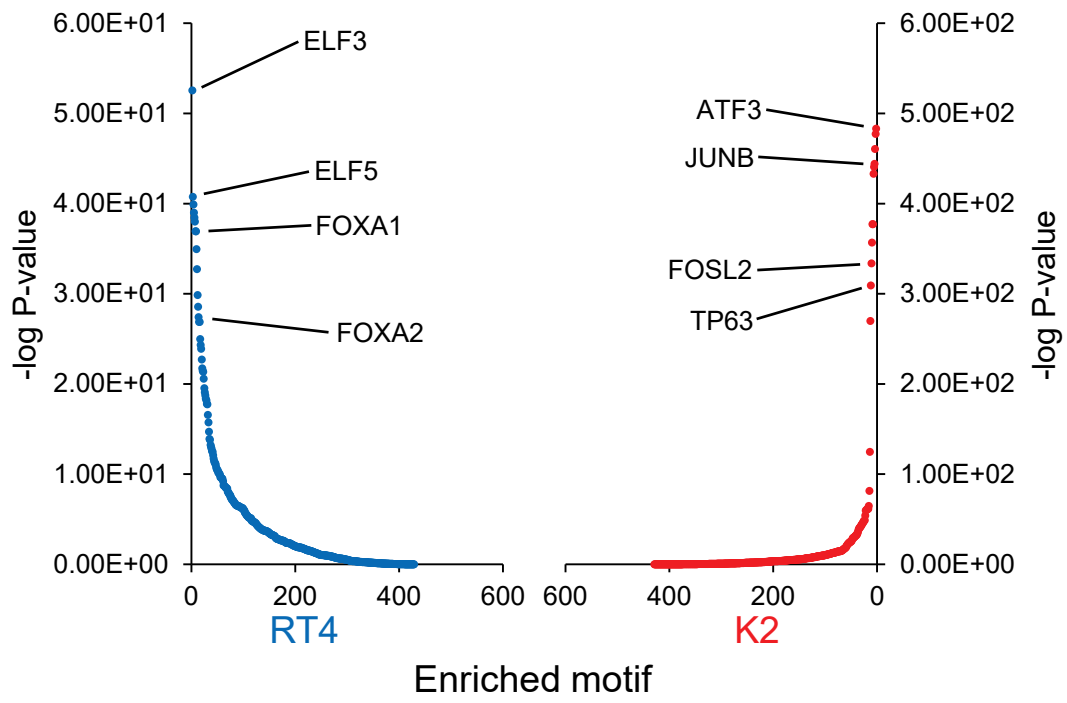

Supplement: can-22-1444_supplementary_figure_5_suppsf5.pdf [file can-22-1444_supplementary_figure_5_suppsf5.pdf]

A

### FOXA1 ChIP-seq private peaks

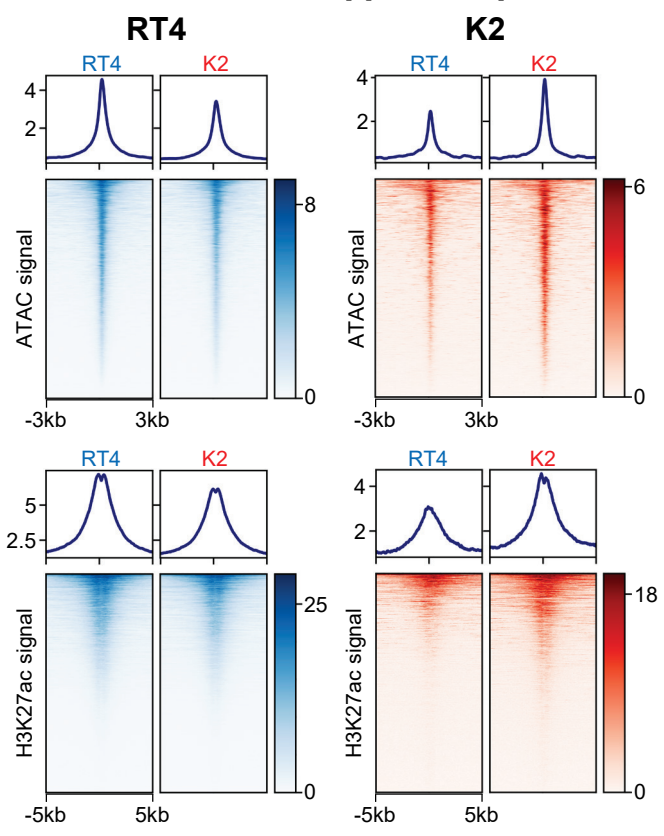

B

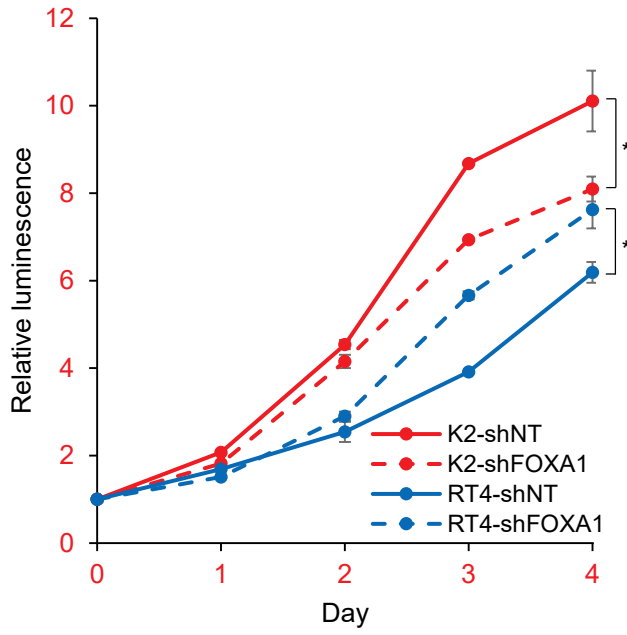

Supplement: can-22-1444_supplementary_figure_6_suppsf6.pdf [file can-22-1444_supplementary_figure_6_suppsf6.pdf]

# Supp. Fig. 7

**A**

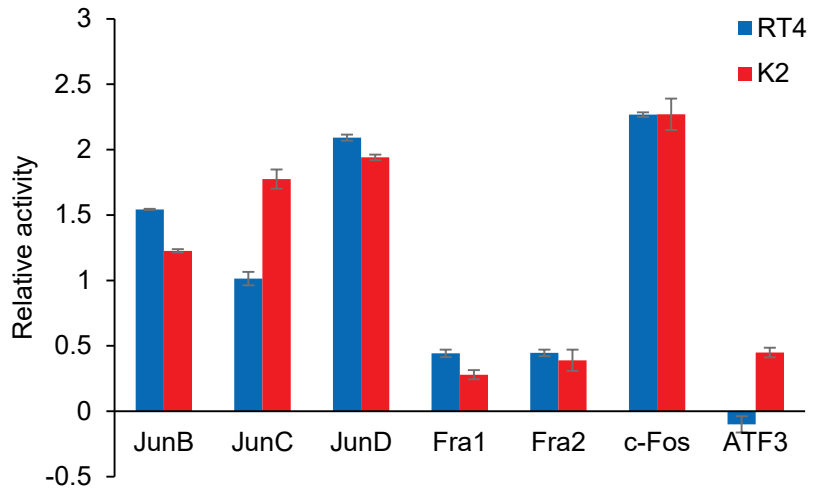

**B**

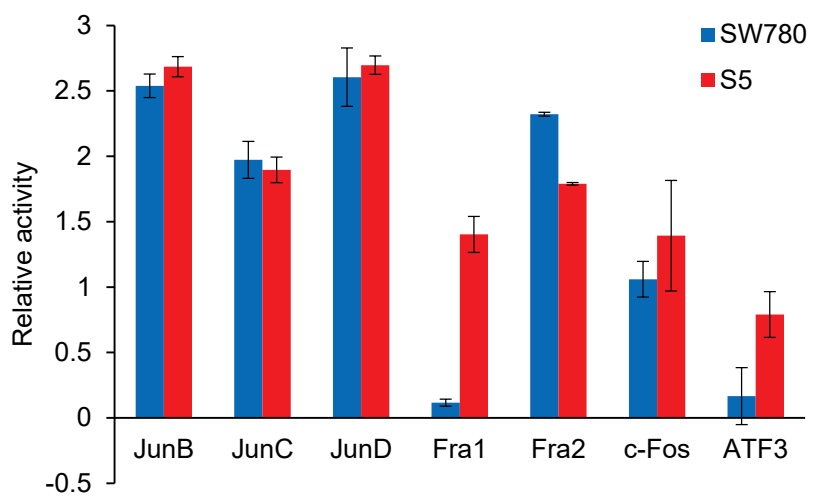

Supplement: can-22-1444_supplementary_figure_7_suppsf7.pdf [file can-22-1444_supplementary_figure_7_suppsf7.pdf]

# Supp. Fig. 8

**A**

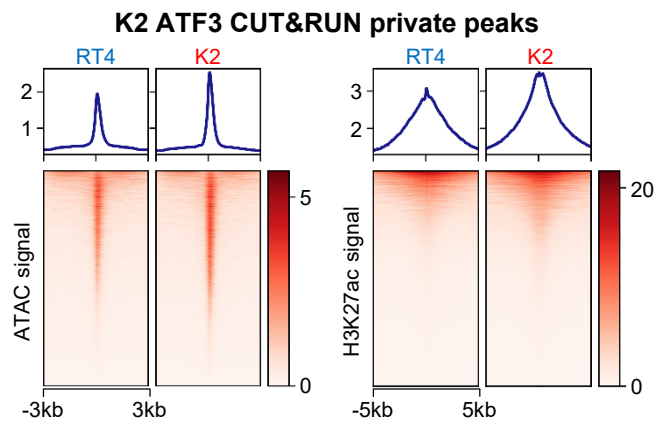

**B**

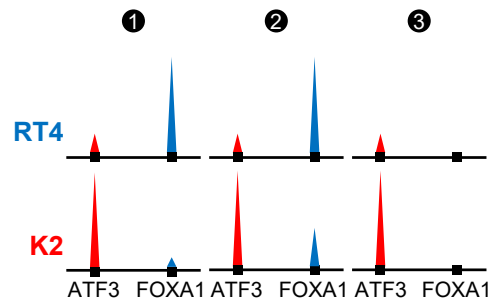

**C**

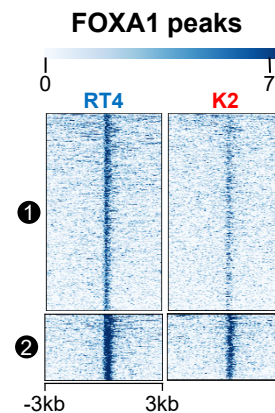

**D**

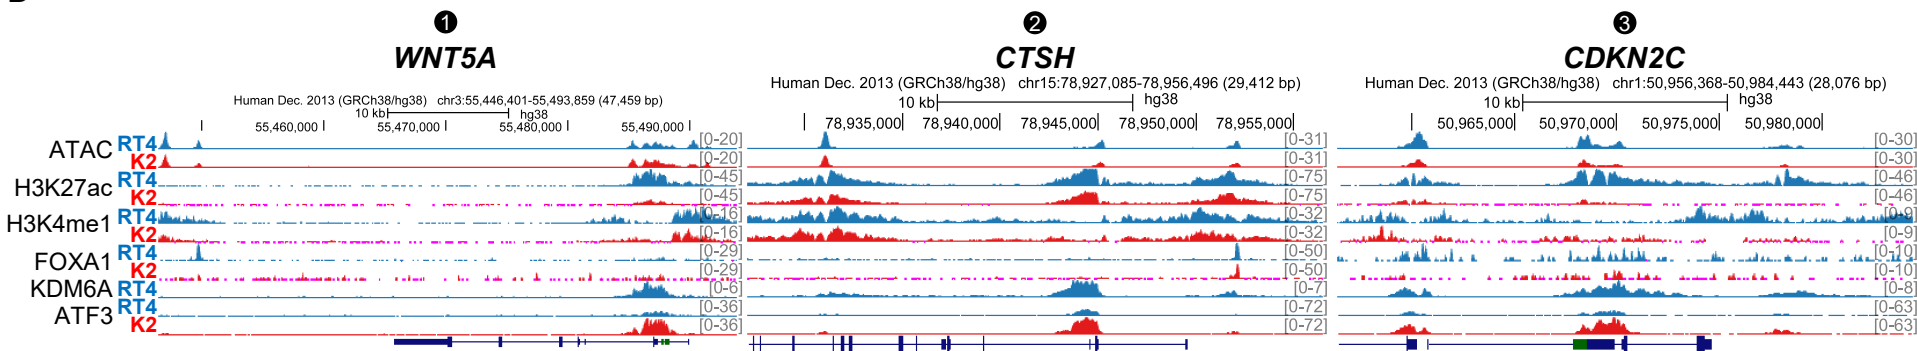

Supplement: can-22-1444_supplementary_figure_8_suppsf8.pdf [file can-22-1444_supplementary_figure_8_suppsf8.pdf]
